# Supplementary material
Source: publisher figshare collection journal article supplement (https://rs.figshare.com/ndownloader/files/16783655)
Supplement: Supplementary file 1 [file 16783655]

## Sheet: Sfp1 asteroids summary
Table S3: Overview of species for Sfp1beta antibody and histological staining and presence of Sfp1 sequences in the transcriptome.
order	family	Species	Sfp1beta peptide immuno-reactivity	fixation	trichrome staining	tube foot morphology	source	Sfp1 sequence present in transcriptome	tissue used for transcriptome
Forcipulatida	Asteriidae	Asterias rubens	yes	PFA	Suppl. Fig. 3a	reinforced disc-ending	Santos et al. 2005	full length/parial	tube feet/ovaries
	Asteriidae	Asterias forbensi	not tested			reinforced disc-ending		partial	ovaries
	Asteriidae	Pisaster ochraceus	not tested			reinforced disc-ending	Santos et al. 2005	full length	muscle
	Asteriidae	Marthasterias glacialis	yes	PFA	Suppl. Fig. 3b	reinforced disc-ending	Santos et al. 2005	partial	ovaries
	Asteriidae	Leptasterias sp.	not tested			reinforced disc-ending		partial	ovaries
	Asteriidae	Anasterias sp.	no	EtOH	Suppl. Fig. 3c	reinforced disc-ending	this study
	Heliasteridae	Labidiaster annulatus	no	EtOH	Suppl. Fig. 3d	reinforced disc-ending	this study	patrial	muscle
Velatida	Korethrasteridae	Peribolaster folliculatus BJ30	not tested					partial	muscle
	Korethrasteridae	Remaster gourdoni	no	EtOH	Supp. Fig. 3e	reinforced disc-ending	this study	parial	muscle
	Pterasteridae	Pteraster tesselatus	not tested			reinforced disc-ending		full length	muscle
	Pterasteridae	Pteraster sp.	no	EtOH	Supp. Fig. 3f	reinforced disc-ending	this study
	Pterasteridae	Hymenaster sp.	not tested	EtOH		Knob-ending	this study
	Pterasteridae	Diplopteraster sp.	no	EtOH	Supp. Fig. 3g	reinforced disc-ending	this study
	Porcellanasteridae	Styracaster sp.	no	EtOH		Knob-ending	this study
	Myxasteridae	Myxaster sp.	no	EtOH	Supp. Fig. 3h	reinforced disc-ending	this study
Paxillosida	Astropectinidae	Psilaster charcoti	no	EtOH		Knob-ending	Vickery and McClintock 2000	partial	muscle
	Astropectinidae	Astropecten duplicatus	not tested			Knob-ending		partial	muscle
	Astropectinidae	Astropecten polyacanthus	no	PFA	Suppl. Fig. 3i	Knob-ending	Santos et al. 2005
	Astropectinidae	Leptychaster	no	EtOH		Knob-ending	this study
	Luidiidae	Luidia clathrata	not tested			Knob-ending		patrial	ovaries
	Luidiidae	Luidia ciliaris	no	PFA	Suppl. Fig. 3j	Knob-ending	this study
	Benthopectinidae	Cheiraster Luidiaster sp.	no	EtOH	Suppl. Fig. 3k	Knob-ending	this study
Spinulosida	Echinasteridae	Echinaster sepositus	no	PFA	Suppl. Fig. 3l	reinforced disc-ending	Santos et al. 2005
	Echinasteridae	Henricia sp.	yes	EtOH	Supp. Fig. 3m	reinforced disc-ending	this study
	Echinasteridae	Henricia oculata	no	PFA	Supp. Fig. 3n	reinforced disc-ending	this study
Valvatida	Asterinidae	Patiria pectinifera	not tested					full length/partial	tube feet/ovaries
	Asterinidae	Patiria miniata	not tested					partial	ovaries
	Asterinidae	Asterina gibbosa	no	PFA	Supp. Fig. 3o	reinforced disc-ending	Santos et al. 2005	partial	tube feet
	Acanthasteridae	Acanthaster planci	no	PFA		simple disc-ending	Santos et al. 2005	partial	tube feet
	Asteropseidae	Asteropsis carinifera	not tested					partial	muscle
	Poraniidae	Glabraster antarctica	no	EtOH	Supp. Fig. 3p	simple disc-ending	this study	partial	muscle
	Goniasteridae	Chitonaster trangae	no	EtOH	Supp. Fig. 3q	simple disc-ending	this study
	Ophidiasteridae	Linckia leavigata	no	EtOH	Supp. Fig. 3r	simple disc-ending	Santos et al. 2005
	Ophidiasteridae	Linckia guildingi	no	PFA	Supp. Fig. 3s	simple disc-ending	this study
	Oreasteridae	Choriaster granulosus	no	PFA	Supp. Fig. 3t	simple disc-ending	this study
	Oreasteridae	Protoreaster nodosus	no	PFA	Supp. Fig. 3u	simple disc-ending	this study
